36 **Synopsis:** Germicidal ultraviolet light initiates indoor oxidation chemistry, potentially forming  
37 indoor air pollutants. The amount is not negligible and depends on both the wavelength of light  
38 and the ventilation level.  
39

40 **Introduction**

41 Germicidal ultraviolet light (GUV) has been employed to disinfect air in indoor spaces since the  
42 1930s.<sup>1</sup> It has been shown to effectively limit the airborne transmission of infectious diseases,  
43 e.g., measles and tuberculosis.<sup>1-3</sup> This is due to photon-induced dimerization of pyrimidines in  
44 the nucleic acids of airborne pathogens (and loss of their ability to replicate as a result). GUV  
45 fixtures use lamps that emit in the UVC range, most commonly at 254 nm (referred to  
46 hereinafter as “GUV254”).<sup>4</sup> As 254 nm UV can cause skin and eye irritation on overexposure,<sup>5</sup>  
47 GUV254 is usually applied near the ceiling, either inside an enclosed ceiling-mounted box, or  
48 irradiating the open air in the upper room (Figure 1a) or inside ventilation ducts. Recently, 222  
49 nm UV has been shown to not only have strong capability of inactivating airborne viruses,<sup>6</sup> but  
50 also is reported by some<sup>7</sup> to be safer to humans (despite reports of the contrary),<sup>8</sup> potentially  
51 allowing whole-room GUV applications (GUV222) (Fig. 1b). Ground-resting GUV-based air  
52 cleaners have also been commercialized, in which a fan continuously pulls air into a box and  
53 exposes it to UV light, from which the occupants are shielded.<sup>9</sup>

54

55 (a)

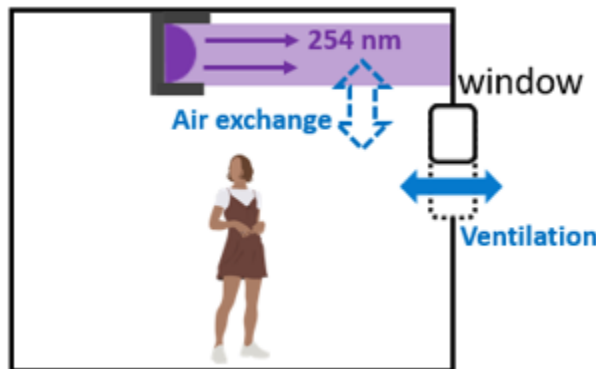

56

57

58

59

60

61

62

63

64

65

66

(b)

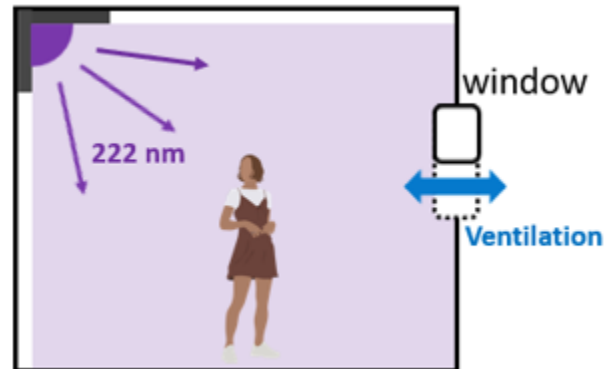

67 (c)

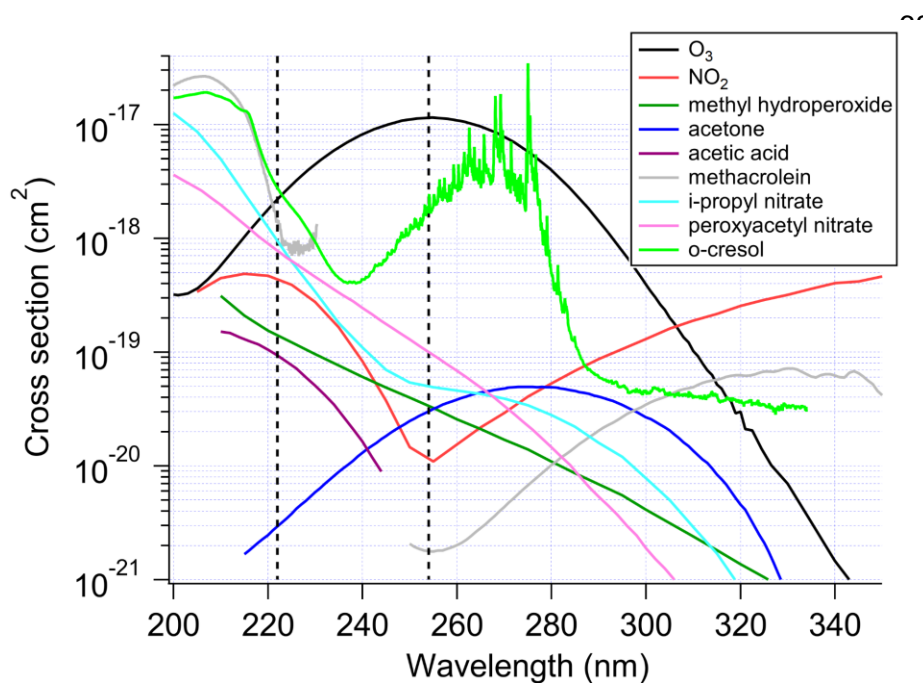

**Figure 1.**

Schematics of a germicidal ultraviolet air disinfection system at (a) 254 nm and at (b) 222 nm in a room; (c) absorption cross sections of several important gas-phase species relevant to this study (a discontinuity in the spectrum of

82 *methacrolein is due to lack of data*).

83

84 During the ongoing coronavirus disease 2019 (COVID-19) pandemic, UV has drawn renewed  
85 and increasing interest as a tool for airborne virus inactivation. Inhalation of airborne virus is  
86 widely accepted as the main transmission route of COVID-19,<sup>10-12</sup> which explains the dominant  
87 indoor character of transmission.<sup>13</sup> An important component of the transmission is due to  
88 superspreading events,<sup>14</sup> which have been shown to be partly explained by shared-room  
89 airborne transmission.<sup>15</sup> Much transmission also happens in close proximity due to short-range  
90 airborne transmission, but even in this situation a substantial fraction of the inhaled virus may  
91 come from well-mixed room air.<sup>16,17</sup> As the pandemic continues, and with the possible  
92 appearance of new variants, there is a pressing need to remove viable severe acute respiratory  
93 syndrome coronavirus 2 (SARS-CoV-2) from indoor environments.<sup>3</sup> Similar measures would be  
94 beneficial for other airborne diseases such as tuberculosis, measles, or a future pandemic virus.  
95

96 Physical measures such as (natural and/or mechanical) ventilation and air filtration have been  
97 proven safe and effective.<sup>18</sup> Nevertheless, mechanical ventilation and air filtration usually can  
98 remove airborne pathogens only at a few effective air changes per hour (ACH)<sup>19</sup> and natural  
99 ventilation can be highly variable and impractical depending on weather, or when pollution,  
100 allergens or noise are present outdoors. When a high virus removal rate (e.g., >10 ACH) needs

101 to be ensured (e.g., in high-risk environments), GUV emerges as a practical and potentially  
102 cost-effective way to achieve it.<sup>3,18</sup>

103

104 UVC light is known to generate strong oxidants (e.g., OH radicals, and sometimes also O<sub>3</sub>  
105 depending on the wavelengths used),<sup>20</sup> which can subsequently oxidize volatile organic  
106 compounds (VOCs) indoors and initiate organic radical chemistry in indoor air.<sup>21,22</sup> Energetic  
107 UVC photons can also directly photolyze many VOCs, such as peroxides<sup>23,24</sup> and carbonyls,<sup>25,26</sup>  
108 and generate organic radicals. This radical chemistry is thought to lead to further oxidation of  
109 indoor VOCs and the formation of oxygenated VOCs (OVOCs) and secondary organic aerosol  
110 (SOA), both of which may have negative health effects.<sup>27</sup> Surveys of the concentration of total  
111 VOCs in the indoor environments range from ~0.1-4 mg m<sup>-3</sup>.<sup>28-30</sup> Thus there is always a  
112 significant amount of VOC to react with any radicals and oxidants that are generated indoors,  
113 and any air cleaning technique that can create radicals and/or oxidants indoors have the  
114 potential to lead to secondary chemistry.<sup>27</sup> Very few studies on this topic have been conducted  
115 with state-of-the-art measurements or models. Recently, air cleaning devices based on  
116 chemistry induced by UV light (photocatalysis and OH generation, but not GUV), often also  
117 marketed as suitable for air disinfection, have been experimentally shown to produce significant  
118 amounts of OVOCs and SOA.<sup>31,32</sup>

119

120 Despite the potential of GUV to cause secondary chemistry, to our knowledge this topic has not  
121 been studied in detail to date. Some studies of GUV inactivation effectiveness have included  
122 measurements of ozone, to assess whether any was generated.<sup>9</sup> These studies report no  
123 production of ozone when mercury vapor lamps coated to limit emission from wavelengths  
124 nearer to the ozone generating wavelength of 185 nm are used, as expected. However, some  
125 uncoated or improperly-coated lamps are commercially available, so ozone production can be a  
126 problem in some cases. In this study, we perform a first evaluation of the impacts of GUV at  
127 both 254 nm (assuming properly-coated lamps) and 222 nm on indoor air quality, using a  
128 model. The amounts of OVOC and SOA that can be formed in typical indoor environments are  
129 investigated.

130

131

## 132 **Materials and Methods**

133 We include the photochemistry due to GUV and subsequent radical, oxidation, and SOA  
134 formation chemistries. Given the complexity of the composition of indoor air, we simplify both

135 the chemical species present indoors and the reaction scheme, while keeping them consistent  
136 with the state-of-the-art knowledge for indoor air. Surface reactions are neglected but could be  
137 important, and should be investigated in future studies.

138

139 The chemical mechanism for this study is a combination of the inorganic radical chemistry in an  
140 oxidation flow reactor (OFR)<sup>20,33,34</sup> and part of the Regional Atmospheric Chemistry Mechanism  
141 (RACM)<sup>35</sup> relevant to this study. The OFR also employs UVC lamps, with the explicit purpose of  
142 generating radicals that initiate oxidation reactions. OFR are used extensively in atmospheric  
143 chemistry research. A common OFR operation mode (“OFR254”) uses 254 nm UV light from  
144 filtered mercury lamps to photolyze O<sub>3</sub>, through which O(<sup>1</sup>D) is generated, which subsequently  
145 reacts with water vapor to form OH.<sup>20,33</sup> OFR254 uses the same type of lamps as GUV254 and  
146 thus OH is expected to form through the same chemistry. Therefore, all reactions of this  
147 inorganic radical chemistry are adopted.<sup>20</sup> For organic chemistry, the relevant reactions in  
148 RACM are adopted. Among major relevant (lumped) species are HC8 (alkanes, alcohols, and  
149 esters with relatively fast reaction rate with OH), LIM (limonene), KET (ketones), ALD  
150 (aldehydes), OP2 (higher organic peroxides), and ACO3 (acylperoxy radicals). Section S1 in the  
151 Supp. Info. provides more details of the adaptation of RACM to this study, and Table S1 lists all  
152 organic reactions modeled in the present work. All photolysis cross sections are adopted from  
153 refs 36,37 when available, otherwise estimated from those of molecules containing the same  
154 functional groups according to the framework of Peng et al.<sup>38</sup> All quantum efficiencies for  
155 reactant photodissociation except those with available data in refs 36,37 are assumed to be 1,  
156 given the high photon energies involved. For GUV222, the photolysis frequencies are calculated  
157 using the light flux at that wavelength. The chemical mechanisms are run within the open-  
158 source KinSim chemical kinetics simulator,<sup>39</sup> and are made available in the Supp. Info. and at  
159 the KinSim cases page.<sup>40</sup> We perform all simulations until a steady state is reached.

160

161 We investigate a typical indoor space with representative indoor and urban outdoor air  
162 concentrations from the literature, as shown in Table S2. The atmospheric pressure and  
163 temperature in the room are assumed to be 1 atm and 295 K, respectively, with a relative  
164 humidity of 37% (water vapor mixing ratio of 1%), and initial NO, HONO, NO<sub>2</sub>, and O<sub>3</sub>  
165 concentrations of 1, 5, 10, and 10 ppbv, respectively. The initial concentrations of most VOCs  
166 are estimated based on the compilation of McDonald et al.,<sup>41</sup> with the total VOC concentration  
167 assumed to be 1.7 mg m<sup>-3</sup>, a typical value for US indoor spaces.<sup>28</sup> Section S2 details how some  
168 individual species are lumped to enable combining the inventory of McDonald et al.<sup>41</sup> with the

169 chemical reaction scheme of this study and how the fraction of each (lumped) species in the  
170 total VOC is estimated. The only exceptions to this initial VOC concentration estimation are that  
171 we assign higher concentrations of 300 ppb to acetone as measured by Price et al.<sup>30</sup> and of 2  
172 ppm to formaldehyde per ref 28.

173  
174 The 254 nm GUV fixture in our simulations is based on the AeroMed LEXUS L2.1 Open.<sup>42</sup> The  
175 space irradiated by this device is 45 m<sup>3</sup>, and is placed in a room of 300 m<sup>3</sup> (volume of a typical  
176 classroom), thus the irradiated volume is 15% of the volume of the room, consistent with refs  
177 43,44. The model for 254 nm GUV has two compartments (“boxes”), one for the irradiated zone  
178 and the other for the rest of the room, while that for 222 nm GUV has only one box. For the  
179 GUV254 case we set an air exchange rate for the irradiated zone at 240 h<sup>-1</sup> (with the  
180 unirradiated zone),<sup>45</sup> which leads to a modeled effective GUV virus removal rate for the whole  
181 room of ~30 h<sup>-1</sup> (equivalent ACH) using a SARS-CoV-2 UV inactivation rate of 0.79 cm<sup>2</sup>/mJ.<sup>6</sup>  
182 Such an equivalent ACH is representative of well-designed indoor GUV applications.<sup>3,43,44</sup> Air  
183 within a modeled indoor air compartment is assumed to be well mixed. Although highly reactive  
184 radicals (e.g., OH) may not travel far from the irradiated zone due to short lifetimes,<sup>46</sup> their  
185 concentrations can still be averaged over the entire unirradiated space because of their low  
186 concentrations and thus the low importance of self- and cross-reactions in their fates. Based on  
187 the UV inactivation rate constants at 222 nm for SARS-CoV-2,<sup>6,7</sup> the UV intensity of the 222 nm  
188 fixture is adjusted such that this fixture also provides the same whole-room effective virus  
189 removal rate as for GUV254 (see Section S3 for the details of UV intensity calculation). Three  
190 levels of ventilation, i.e., a representative residential level (0.3 ACH, “low ventilation”),<sup>47</sup> a  
191 representative commercial level (3 ACH, “medium ventilation”),<sup>19</sup> and a representative medical  
192 level (9 ACH, “high ventilation”)<sup>3</sup> are simulated in this study. Indoor VOC emissions are set such  
193 that all VOC concentrations remain at their literature-constrained initial values at low ventilation  
194 without chemistry occurring. We assume no NO<sub>x</sub> or O<sub>3</sub> emissions indoors, and 5 ppb NO, 20  
195 ppb NO<sub>2</sub>, 40 ppb O<sub>3</sub> outdoors. No VOC is assumed to be present in outdoor air, as outdoor  
196 VOC levels are typically much lower than indoor ones.<sup>29,30</sup> The O<sub>3</sub> surface loss rate in the  
197 absence of chemistry is set to 2.8 h<sup>-1</sup>, which is typical of residences<sup>48</sup> and is known to be  
198 sensitive to occupancy and the indoor surfaces present. To test COVID-19 infection risk in  
199 different situations, we assume the presence of an infector shedding SARS-CoV-2 at 16 quanta  
200 h<sup>-1</sup> (roughly for light exercise while speaking 50% time),<sup>49</sup> which is consistent or lower than  
201 values constrained for literature superspreading events.<sup>15</sup> A quantum is an infectious dose, that  
202 if inhaled by a susceptible person, will lead to a probability of infection of 1-1/e.<sup>15,50</sup> The rate of

203 SARS-CoV-2 loss apart from ventilation and GUV (i.e., due to intrinsic loss of infectivity, aerosol  
204 deposition etc.) is assumed to be  $1 \text{ h}^{-1}$ .

205

206

## 207 **Results and Discussion**

208 *Disinfection.* Figure 2 shows the amount of SARS-CoV-2 present in the room to be consistent  
209 with the steady-state prediction. In the absence of GUV, the emission rate of SARS-CoV-2 is 16  
210 quanta  $\text{h}^{-1}$ , and its total loss rate  $1.3 \text{ h}^{-1}$  ( $0.3 \text{ h}^{-1}$  from ventilation and  $1 \text{ h}^{-1}$  from decay and  
211 deposition) for the low-ventilation case. The steady state SARS-CoV-2 quantity in the entire  
212 room is 12.3 quanta. Similarly, it is lowered to 4 and 1.6 quanta by increasing the ventilation rate  
213 to 3 and 9 ACH, respectively. When a GUV fixture with a whole-room virus removal rate of  $\sim 30$   
214  $\text{h}^{-1}$  is applied, the SARS-CoV-2 quantity decreases to  $\sim 0.6$ ,  $\sim 0.5$ , and  $\sim 0.4$  quanta in the low-,  
215 medium-, and high-ventilation cases, respectively. The relative impact of GUV is higher at low  
216 ventilation, as expected.

217



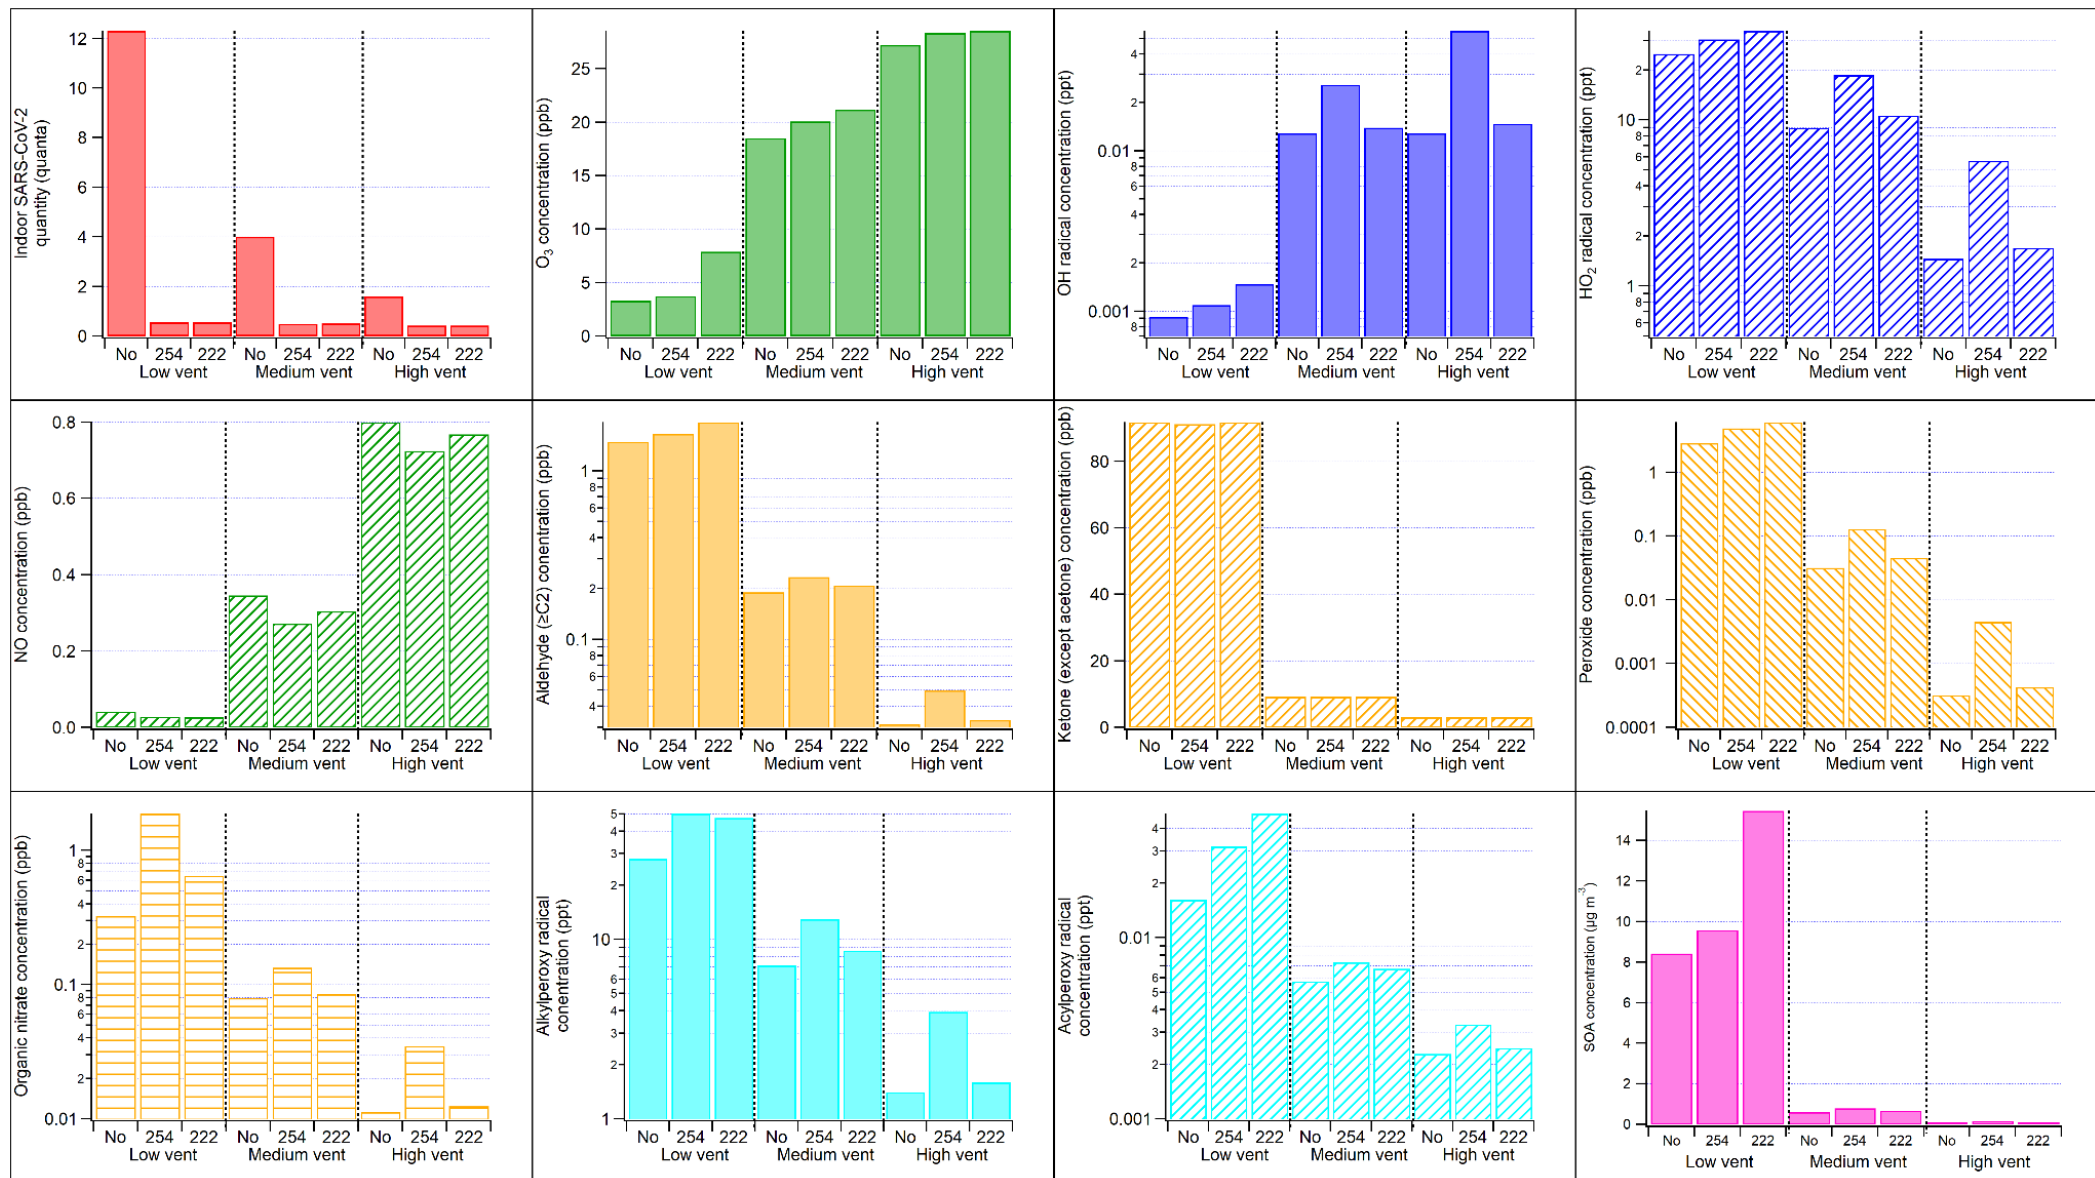

248

249 **Figure 2.** Final quantity/concentration of the main (types of) species of interest in this study under different GUV and ventilation  
 250 conditions. In the GUV254 cases, the volume-weighted average concentrations for the whole room are shown. The stable chemical  
 251 species concentrations are similar between the irradiated and unirradiated zones, while the radical and SARS-CoV-2 concentrations  
 252 in the unirradiated zone can be significantly lower and higher, respectively (Table S3). Note that some panels use log scale for  
 253 concentrations while other panels use linear scale. SOA is assumed to have a molar weight of 200 g mol<sup>-1</sup>.

254 The total quantity of SARS-CoV-2 does not directly reflect its infection risk, which also depends  
255 on the volume of the room and the inhalation by susceptible occupants. For an occupant with a  
256 breathing rate of  $0.5 \text{ m}^3 \text{ h}^{-1}$  (typical for light physical activities)<sup>51</sup> present in the  $300 \text{ m}^3$  room with  
257 low ventilation and no GUV fixture for 1 h,  $\sim 0.02$  quantum is inhaled. This corresponds to an  
258 infection probability of  $\sim 2\%$ , since the infection probability is approximately equal to the inhaled  
259 quanta if the latter is small.<sup>52</sup> For the cases studied in this work, infection risk is reduced by  $x\sim 3$   
260 by medium ventilation, and by a factor of  $\sim 22$  ( $\sim 8$ ) when adding GUV to a low (medium)  
261 ventilation situation. When adding GUV to a high ventilation situation, the risk reduction is less  
262 than a factor of 4.

263  
264 *Secondary Chemistry.* For chemical species in the room, ventilation alone (without GUV) can  
265 make some difference (Fig. 2). The differences in  $\text{O}_3$ , NO, and ketone concentrations are largely  
266 due to these species being ventilated in or out. For other chemical species, secondary chemical  
267 processes also play a role. OH radicals can form even without UV, i.e., from limonene  
268 ozonolysis. As a result, OH radicals are higher at medium and high ventilation, which introduces  
269 more  $\text{O}_3$  from outdoors than at low ventilation. OH concentration at high ventilation is not higher  
270 than medium ventilation because high ventilation also dilutes limonene concentration indoors,  
271 reducing the overall limonene- $\text{O}_3$  reaction rate.  $\text{HO}_2$  radicals are lower at higher ventilation  
272 because of higher NO being ventilated into the room, which reacts with  $\text{HO}_2$ . All other organic  
273 radicals and stable products shown in Fig. 2 (including SOA) have higher concentrations in the  
274 low-ventilation case due to higher VOC concentrations.

275  
276 When GUV<sup>254</sup> is employed, although the concentration of photolyzable  $\text{O}_3$  remains relatively  
277 stable due to much stronger replenishment from outdoor air ventilation than photolytic  
278 destruction, the chemistry is significantly altered by UV (Fig. 2). The fundamental cause of this  
279 change is OH production from  $\text{O}_3$  photolysis under 254 nm UV irradiation.<sup>20</sup> OH concentrations  
280 in the GUV<sup>254</sup> cases are approximately a factor of 1.2-5 and 3-20 times those in the  
281 corresponding no-UV cases for the whole room average and for the irradiated zone,  
282 respectively. The difference in the higher-ventilation cases is larger, due to more  $\text{O}_3$  in the room  
283 from outside air (Fig. 2 and Table S3). OH in the higher-ventilation cases is similar to daytime  
284 outdoor urban levels.<sup>53</sup> This OH level is high enough to drive substantial oxidation of VOCs,  
285 production of other radicals (e.g.,  $\text{HO}_2$  and organic peroxy radicals ( $\text{RO}_2$ )), and SOA formation.  
286 Organic peroxides (including hydroperoxides), carbonyls (aldehydes (excluding formaldehyde)  
287 and ketones (excluding acetone)), and organic nitrates (including peroxy nitrates) are among

288 common VOC oxidation products and all have ~10% to several-fold concentration increases  
289 (Fig. 2). The exceptions are ketones (excluding acetone), whose production is dominated in the  
290 model by UV-independent limonene ozonolysis (Fig. 2). Doubling RH significantly increases OH  
291 concentration, but changes of product species are within 10% of the base RH results, likely due  
292 to non-linear buffering from the reaction scheme (not shown). The exceptions are ketones,  
293 which are relatively unreactive and dominated in the model by the chemistry-independent  
294 acetone emission and its dilution by ventilation (Fig. 2). In addition to VOC oxidation by OH,  
295 radicals (OH, HO<sub>2</sub>, and RO<sub>2</sub>) are also produced by active photolysis of carbonyls and peroxides  
296 at 254 nm, where both strongly absorb (Fig. 1c).

297  
298 Due to higher peroxy radical concentrations, NO is lowered to ~30 ppt at low ventilation (Fig. 2).  
299 Such a low NO concentration leads to reactions of RO<sub>2</sub> with both HO<sub>2</sub> and NO being important,  
300 as estimated per Peng et al.<sup>54</sup> They both account for nearly half of the RO<sub>2</sub> bimolecular loss in  
301 the irradiated space (Fig. S1). Also, without fast RO<sub>2</sub>+NO, RO<sub>2</sub> lifetime is sufficiently long for  
302 unimolecular reactions of RO<sub>2</sub> to occur (Fig. S1) as observed previously indoors for similar  
303 conditions,<sup>55</sup> although RACM does not include these reactions. In the higher ventilation cases,  
304 NO, though still consumed by the photochemistry, is much higher due to a stronger  
305 replenishment from outdoor air and can dominate the RO<sub>2</sub> bimolecular fate (Fig. S1).

306  
307 SOA formation is estimated from the consumption of individual VOCs and SOA mass yields  
308 from the literature (Table S4). Significant SOA production (~8 µg m<sup>-3</sup> at low ventilation) occurs  
309 even with GUV irradiation, through limonene ozonolysis, as this reaction has a high SOA yield  
310 (20%). In the GUV254 cases, both limonene ozonolysis and VOC oxidation by OH contribute to  
311 SOA. Nevertheless, the enhanced contribution from OH oxidation of VOC under GUV irradiation  
312 is a fraction of SOA formed in the no-UV cases (Fig. 2), because of a large fraction of total VOC  
313 present being species too small to form SOA through oxidation (e.g., ethanol, acetone, and  
314 isopropyl alcohol). The overall SOA mass yield from total VOC is of the order of 0.1%. Given  
315 that 1.5 mg m<sup>-3</sup> of total VOCs (excluding limonene) are present, that leads to ~1.2 µg m<sup>-3</sup> due to  
316 GUV254. The enhancement of SOA formation by OH oxidation relative to the no-UV cases  
317 (mainly from VOC ozonolysis) decreases with ventilation, as VOC concentrations are lowered  
318 by higher ventilation (Fig. 2). The SOA precursors and mechanism used in this work are likely  
319 incomplete, given the incomplete scientific understanding of this topic.<sup>56</sup>

320

321 Due to the fast air exchange between the GUV254 irradiated and unirradiated spaces, the  
322 concentrations of stable species are similar between these two spaces (Table S3). In contrast,  
323 radicals are more rapidly consumed in the unirradiated space than supplied by the transport  
324 from the irradiated space, and thus have much lower concentrations (up to >1 order of  
325 magnitude for highly reactive ones such as OH and acylperoxy) in the unirradiated space than  
326 in the irradiated space.

327  
328 The GUV222 cases in this study assume irradiation of the entire room volume (Fig. 1b). Also,  
329 photons at 222 nm are able to photolyze O<sub>2</sub> and produce O<sub>3</sub>, albeit at a small rate, leading to  
330 higher O<sub>3</sub> in all cases relative to GUV254. The amounts of organic products formed in the  
331 medium- and high-ventilation (low-ventilation) cases are lower (higher) than in the unirradiated  
332 zone in the GUV254 cases (Fig. 2).

333  
334 At medium and high ventilation rates, the main O<sub>3</sub> source in the GUV222 cases is still outdoor  
335 O<sub>3</sub> through ventilation. Despite the slightly stronger O<sub>3</sub> production due to O<sub>2</sub> photolysis, the  
336 product formation enhancement in these GUV222 cases is much smaller than in the  
337 corresponding GUV254 cases (Fig. 2). These results indicate a very weak OH-initiated VOC  
338 oxidation in these cases on top of the VOC ozonolysis chemistry that is active in the no-UV  
339 cases.

340  
341 This difference from the active photochemistry in the GUV254 cases can be attributed to several  
342 factors. First, the UV irradiance of the 222 nm fixture is significantly lower, even in terms of the  
343 number of photons emitted per unit time. 222 nm photons are ~40% more efficient in  
344 inactivating SARS-CoV-2 than 254 nm photons.<sup>6</sup> In addition the latter cannot be used in the  
345 most efficient fashion. Due to the need to protect humans from irradiation, all photons are  
346 concentrated in the small irradiated zone (15% of the room volume). Because of the limitation of  
347 transport of virus-containing aerosol from the unirradiated zone, the steady-state infectious virus  
348 concentration is ~70% lower than in the unirradiated zone, where the infector and the  
349 susceptible individuals are present (Table S3). Even with the same per-photon virus inactivation  
350 efficiency, GUV254 needs about 3 times the photons for GUV222 to reach the same effective  
351 GUV virus removal rate for the occupied unirradiated space. Furthermore, the first step of OH  
352 photochemical production is O<sub>3</sub> photolysis, whose corresponding absorption at 222 nm is about  
353 ~5 times lower than at 254 nm (Fig. 1c). Simple carbonyl compounds, the most abundant  
354 OVOCs in this study, also absorb much less efficiently at 222 nm than at 254 nm (Fig. 1c),

355 further reducing radical production. Although other products, such as peroxides and conjugated  
356 carbonyl species, can have stronger absorption at 222 nm, their relatively low concentrations  
357 (~1 ppb or lower vs. hundreds of ppb of ketones) limit their relative contributions to the radical  
358 budget.

359  
360 Because of the small direct production of O<sub>3</sub> by the GUV222 lights, O<sub>3</sub> in the GUV222 low-  
361 ventilation case is substantially less depleted by limonene ozonolysis than for GUV254. As a  
362 result, compared to GUV254 SOA formation through limonene ozonolysis is substantially  
363 stronger and OH concentration is also higher (Fig. 2) despite a lower cross section of O<sub>3</sub>  
364 photolysis at 222 nm. Other gas-phase stable organic products have comparable concentrations  
365 with those in the GUV254 case.

366  
367 *Implications.* We have shown that GUV disinfection can induce active photochemistry producing  
368 OVOCs and SOA in typical indoor environments. Under the conditions simulated here, these  
369 products do not necessarily have significant negative effects on human health because of their  
370 relatively low concentrations. Among the VOCs (including OVOCs) modeled in this study, only  
371 formaldehyde has a concentration exceeding the Minimal Risk Level (MRL) recommended by  
372 the CDC<sup>57</sup> due to strong indoor emissions. However, only a very limited number of species were  
373 explicitly modeled in this study, particularly aldehydes, whose toxicity is generally high. Future  
374 studies with higher chemical speciation are needed to better assess the toxicity of gas-phase  
375 products. In polluted indoor spaces and/or outdoor atmospheric environments, the indoor  
376 concentrations of the VOCs of interest can be much higher,<sup>24</sup> while the GUV-induced  
377 photochemistry can still be active (see Sections S4 and S5 for more detail). In this case, OVOC  
378 products might exceed the MRLs and SOA formation might reach tens of μg m<sup>-3</sup>.

379  
380 The risk of GUV254 due to secondary photochemical products is not negligible but also not  
381 dominant under typical indoor conditions. The risk for GUV222 appears to be substantially lower  
382 when ventilation is not poor, but comparable or slightly higher in case of poor ventilation. We  
383 note that many indoor environments, in particular homes and schools, have ventilation rates  
384 similar to the definition of “poor” in this paper, even in high-income countries. If GUV222 is  
385 confirmed to be safe for direct human exposure, it would have an advantage over GUV254 at  
386 mid to high ventilation rates in terms of indoor chemistry, in addition to more efficient air  
387 disinfection. When 254 nm fixtures are used, a strong air exchange between the irradiated and  
388 unirradiated zones (e.g., by fans) is preferable, as recommended by the CDC/NIOSH.<sup>58</sup> It can

389 lower the UV irradiance needed for a given virus inactivation rate,<sup>59</sup> and hence limit the induced  
390 photochemistry. Good ventilation can not only remove airborne pathogens, but also limit the  
391 production of secondary indoor pollutants, and is thus also recommended when outdoor air is  
392 relatively clean.<sup>19,60</sup> Similarly, particulate air filtration is also recommended as it removes both  
393 virus-containing aerosol, indoor-formed SOA, and particulate pollution from other indoor and  
394 outdoor sources. Gas filtration with sorbent materials such as activated carbon is also useful for  
395 reducing VOC, NO<sub>x</sub> and ozone levels indoors.<sup>61,62</sup> The findings of this study are limited due to  
396 modeling assumptions, e.g., the simplified chemical mechanism, limited data on photolysis  
397 parameters in the UVC range (particularly the quantum yields of aromatics), the assumed indoor  
398 and outdoor air pollutant compositions, uncertainties over precursors and yields of SOA  
399 formation, and surface reactions, which are still uncertain and/or variable. Experimental studies  
400 in both simplified laboratory settings and real indoor conditions are needed to fully constrain the  
401 impacts of GUV in indoor chemistry.

402

403

#### 404 **Acknowledgements**

405 ZP and JLJ were partially supported by the CIRES Innovative Research Program. We thank  
406 Vito Ilacqua, Zachary Finewax, Donald Milton, and Edward Nardell for valuable discussions.

407

408

409

#### 410 **References**

- 411 (1) Wells, W. F.; Wells, M. W.; Wilder, T. S. The Environmental Control of Epidemic Contagion.  
412 I. *An epidemiologic study of radiant disinfection of air in day schools* *Am J Hyg* **1942**, *35*,  
413 97–121.
- 414 (2) Riley, R. L.; Mills, C. C.; O'grady, F.; Sultan, L. U.; Wittstadt, F.; Shivpuri, D. N.  
415 Infectiousness of Air from a Tuberculosis Ward. Ultraviolet Irradiation of Infected Air:  
416 Comparative Infectiousness of Different Patients. *Am. Rev. Respir. Dis.* **1962**, *85*, 511–525.
- 417 (3) Nardell, E. A. Air Disinfection for Airborne Infection Control with a Focus on COVID-19:  
418 Why Germicidal UV Is Essential. *Photochem. Photobiol.* **2021**, *97* (3), 493–497.
- 419 (4) Riley, R. L.; Nardell, E. A. Clearing the Air: The Theory and Application of Ultraviolet Air  
420 Disinfection. *American Review of Respiratory Disease*. 1989, pp 1832–1832.  
421 <https://doi.org/10.1164/ajrccm/140.6.1832b>.
- 422 (5) Zaffina, S.; Camisa, V.; Lembo, M.; Vinci, M. R.; Tucci, M. G.; Borra, M.; Napolitano, A.;  
423 Cannatà, V. Accidental Exposure to UV Radiation Produced by Germicidal Lamp: Case  
424 Report and Risk Assessment. *Photochem. Photobiol.* **2012**, *88* (4), 1001–1004.
- 425 (6) Ma, B.; Gundy, P. M.; Gerba, C. P.; Sobsey, M. D.; Linden, K. G. UV Inactivation of SARS-  
426 CoV-2 across the UVC Spectrum: KrCl\* Excimer, Mercury-Vapor, and LED Sources. *Appl.*  
427 *Environ. Microbiol.* **2021**. <https://doi.org/10.1128/AEM.01532-21>.

- 428 (7) Buonanno, M.; Welch, D.; Shuryak, I.; Brenner, D. J. Far-UVC Light (222 Nm) Efficiently  
429 and Safely Inactivates Airborne Human Coronaviruses. *Sci. Rep.* **2020**, *10* (1), 10285.
- 430 (8) Ong, Q.; Wee, W.; Cruz, J. D.; Ronnie Teo, J. W.; Han, W. 222-Nm Far UVC Exposure  
431 Results in DNA Damage and Transcriptional Changes to Mammalian Cells. *bioRxiv*, 2022,  
432 2022.02.22.481471. <https://doi.org/10.1101/2022.02.22.481471>.
- 433 (9) Kujundzic, E.; Matalakah, F.; Howard, C. J.; Hernandez, M.; Miller, S. L. UV Air Cleaners  
434 and Upper-Room Air Ultraviolet Germicidal Irradiation for Controlling Airborne Bacteria and  
435 Fungal Spores. *J. Occup. Environ. Hyg.* **2006**, *3* (10), 536–546.
- 436 (10) Wang, C. C.; Prather, K. A.; Sznitman, J.; Jimenez, J. L.; Lakdawala, S. S.; Tufekci, Z.;  
437 Marr, L. C. Airborne Transmission of Respiratory Viruses. *Science* **2021**, *373* (6558),  
438 eabd9149.
- 439 (11) Greenhalgh, T.; Jimenez, J. L.; Prather, K. A.; Tufekci, Z.; Fisman, D.; Schooley, R. Ten  
440 Scientific Reasons in Support of Airborne Transmission of SARS-CoV-2. *Lancet* **2021**.  
441 [https://doi.org/10.1016/S0140-6736\(21\)00869-2](https://doi.org/10.1016/S0140-6736(21)00869-2).
- 442 (12) Klompas, M.; Milton, D. K.; Rhee, C.; Baker, M. A.; Leekha, S. Current Insights Into  
443 Respiratory Virus Transmission and Potential Implications for Infection Control Programs :  
444 A Narrative Review. *Ann. Intern. Med.* **2021**, *174* (12), 1710–1718.
- 445 (13) Qian, H.; Miao, T.; Liu, L.; Zheng, X.; Luo, D.; Li, Y. Indoor Transmission of SARS-CoV-  
446 2. *Indoor Air* **2020**, in press.
- 447 (14) Adam, D. C.; Wu, P.; Wong, J. Y.; Lau, E. H. Y.; Tsang, T. K.; Cauchemez, S.; Leung,  
448 G. M.; Cowling, B. J. Clustering and Superspreading Potential of SARS-CoV-2 Infections in  
449 Hong Kong. *Nat. Med.* **2020**, *26* (11), 1714–1719.
- 450 (15) Peng, Z.; Rojas, A. L. P.; Kropff, E.; Bahnfleth, W.; Buonanno, G.; Dancer, S. J.;  
451 Kurnitski, J.; Li, Y.; Loomans, M. G. L. C.; Marr, L. C.; Morawska, L.; Nazaroff, W.; Noakes,  
452 C.; Querol, X.; Sekhar, C.; Tellier, R.; Greenhalgh, T.; Bourouiba, L.; Boerstra, A.; Tang, J.  
453 W.; Miller, S. L.; Jimenez, J. L. Practical Indicators for Risk of Airborne Transmission in  
454 Shared Indoor Environments and Their Application to COVID-19 Outbreaks. *Environ. Sci.*  
455 *Technol.* **2022**, *56* (2), 1125–1137.
- 456 (16) Li, Y.; Cheng, P.; Jia, W. Poor Ventilation Worsens Short-Range Airborne Transmission  
457 of Respiratory Infection. *Indoor Air* **2022**, *32* (1), e12946.
- 458 (17) Jimenez, J. L.; Peng, Z.; Pagonis, D. Systematic Way to Understand and Classify the  
459 Shared-Room Airborne Transmission Risk of Indoor Spaces. *Indoor Air* **2022**, *32* (5),  
460 e13025.
- 461 (18) Morawska, L.; Allen, J.; Bahnfleth, W.; Bluysen, P. M.; Boerstra, A.; Buonanno, G.;  
462 Cao, J.; Dancer, S. J.; Floto, A.; Franchimon, F.; Greenhalgh, T.; Haworth, C.; Hogeling, J.;  
463 Isaxon, C.; Jimenez, J. L.; Kurnitski, J.; Li, Y.; Loomans, M.; Marks, G.; Marr, L. C.;  
464 Mazzarella, L.; Melikov, A. K.; Miller, S.; Milton, D. K.; Nazaroff, W.; Nielsen, P. V.; Noakes,  
465 C.; Peccia, J.; Prather, K.; Querol, X.; Sekhar, C.; Seppänen, O.; Tanabe, S.-I.; Tang, J.  
466 W.; Tellier, R.; Tham, K. W.; Wargocki, P.; Wierzbicka, A.; Yao, M. A Paradigm Shift to  
467 Combat Indoor Respiratory Infection. *Science* **2021**, *372* (6543), 689–691.
- 468 (19) ASHRAE. *Ventilation for Acceptable Indoor Air Quality: ANSI/ASHRAE Standard 62.1-*  
469 *2019*; ANSI/ASHRAE, 2019.
- 470 (20) Peng, Z.; Jimenez, J. L. Radical Chemistry in Oxidation Flow Reactors for Atmospheric  
471 Chemistry Research. *Chem. Soc. Rev.* **2020**, *49* (9), 2570–2616.
- 472 (21) Atkinson, R.; Arey, J. Atmospheric Degradation of Volatile Organic Compounds. *Chem.*  
473 *Rev.* **2003**, *103* (12), 4605–4638.
- 474 (22) Ziemann, P. J.; Atkinson, R. Kinetics, Products, and Mechanisms of Secondary Organic  
475 Aerosol Formation. *Chem. Soc. Rev.* **2012**, *41* (19), 6582–6605.
- 476 (23) Blitz, M. A.; Heard, D. E.; Pilling, M. J. Wavelength Dependent Photodissociation of  
477 CH<sub>3</sub>OOH: Quantum Yields for CH<sub>3</sub>O and OH, and Measurement of the OH+ CH<sub>3</sub>OOH  
478 Rate Coefficient. *J. Photochem. Photobiol. A Chem.* **2005**, *176* (1-3), 107–113.

- 479 (24) Vaghjiani, G. L.; Ravishankara, A. R. Photodissociation of H<sub>2</sub>O<sub>2</sub> and CH<sub>3</sub>OOH at 248  
480 Nm and 298 K: Quantum Yields for OH, O(3P) and H(2S). *J. Chem. Phys.* **1990**, *92* (2),  
481 996–1003.
- 482 (25) Link, M. F.; Farmer, D. K.; Berg, T.; Flocke, F.; Ravishankara, A. R. Measuring  
483 Photodissociation Product Quantum Yields Using Chemical Ionization Mass Spectrometry:  
484 A Case Study with Ketones. *J. Phys. Chem. A* **2021**, *125* (31), 6836–6844.
- 485 (26) Rajakumar, B.; Gierczak, T.; Flad, J. E.; Ravishankara, A. R.; Burkholder, J. B. The  
486 CH<sub>3</sub>CO Quantum Yield in the 248 Nm Photolysis of Acetone, Methyl Ethyl Ketone, and  
487 Biacetyl. *J. Photochem. Photobiol. A Chem.* **2008**, *199* (2-3), 336–344.
- 488 (27) Collins, D. B.; Farmer, D. K. Unintended Consequences of Air Cleaning Chemistry.  
489 *Environ. Sci. Technol.* **2021**. <https://doi.org/10.1021/acs.est.1c02582>.
- 490 (28) Logue, J. M.; McKone, T. E.; Sherman, M. H.; Singer, B. C. Hazard Assessment of  
491 Chemical Air Contaminants Measured in Residences. *Indoor Air* **2011**, *21* (2), 92–109.
- 492 (29) Mattila, J. M.; Arata, C.; Abeleira, A.; Zhou, Y.; Wang, C.; Katz, E. F.; Goldstein, A. H.;  
493 Abbatt, J. P. D.; DeCarlo, P. F.; Vance, M. E.; Farmer, D. K. Contrasting Chemical  
494 Complexity and the Reactive Organic Carbon Budget of Indoor and Outdoor Air.  
495 *Environmental Science & Technology*. 2022, pp 109–118.  
496 <https://doi.org/10.1021/acs.est.1c03915>.
- 497 (30) Price, D. J.; Day, D. A.; Pagonis, D.; Stark, H.; Algrim, L. B.; Handschy, A. V.; Liu, S.;  
498 Krechmer, J. E.; Miller, S. L.; Hunter, J. F.; de Gouw, J. A.; Ziemann, P. J.; Jimenez, J. L.  
499 Budgets of Organic Carbon Composition and Oxidation in Indoor Air. *Environ. Sci. Technol.*  
500 **2019**. <https://doi.org/10.1021/acs.est.9b04689>.
- 501 (31) Ye, Q.; Krechmer, J. E.; Shutter, J. D.; Barber, V. P.; Li, Y.; Helstrom, E.; Franco, L. J.;  
502 Cox, J. L.; Hrdina, A. I. H.; Goss, M. B.; Tahsini, N.; Canagaratna, M.; Keutsch, F. N.; Kroll,  
503 J. H. Real-Time Laboratory Measurements of VOC Emissions, Removal Rates, and  
504 Byproduct Formation from Consumer-Grade Oxidation-Based Air Cleaners. *Environmental*  
505 *Science & Technology Letters* **2021**. <https://doi.org/10.1021/acs.estlett.1c00773>.
- 506 (32) Joo, T.; Rivera-Rios, J. C.; Alvarado-Velez, D.; Westgate, S.; Lee Ng, N. Formation of  
507 Oxidized Gases and Secondary Organic Aerosol from a Commercial Oxidant-Generating  
508 Electronic Air Cleaner. *Environmental Science & Technology Letters* **2021**.  
509 <https://doi.org/10.1021/acs.estlett.1c00416>.
- 510 (33) Peng, Z.; Day, D. A.; Stark, H.; Li, R.; Lee-Taylor, J.; Palm, B. B.; Brune, W. H.;  
511 Jimenez, J. L. HO<sub>x</sub> Radical Chemistry in Oxidation Flow Reactors with Low-Pressure  
512 Mercury Lamps Systematically Examined by Modeling. *Atmospheric Measurement*  
513 *Techniques* **2015**, *8* (11), 4863–4890.
- 514 (34) Peng, Z.; Jimenez, J. L. Modeling of the Chemistry in Oxidation Flow Reactors with High  
515 Initial NO. *Atmos. Chem. Phys.* **2017**, *17* (19), 11991–12010.
- 516 (35) Stockwell, W. R.; Kirchner, F.; Kuhn, M.; Seefeld, S. A New Mechanism for Regional  
517 Atmospheric Chemistry Modeling. *J. Geophys. Res.* **1997**, *102* (D22), 25847–25879.
- 518 (36) Burkholder, J. B.; Sander, S. P.; Abbatt, J.; Barker, J. R.; Huie, R. E.; Kolb, C. E.; Kurylo,  
519 M. J.; Orkin, V. L.; Wilmouth, D. M.; Wine, P. H. *Chemical Kinetics and Photochemical Data*  
520 *for Use in Atmospheric Studies: Evaluation Number 18*; Jet Propulsion Laboratory:  
521 Pasadena, CA, USA, 2015.
- 522 (37) Keller-Rudek, H.; Moortgat, G. K.; Sander, R.; Sörensen, R. *The MPI-Mainz UV/VIS*  
523 *Spectral Atlas of Gaseous Molecules of Atmospheric Interest*.  
524 [http://satellite.mpic.de/spectral\\_atlas](http://satellite.mpic.de/spectral_atlas) (accessed 2022-02-10).
- 525 (38) Peng, Z.; Lee-Taylor, J.; Stark, H.; Orlando, J. J.; Aumont, B.; Jimenez, J. L. Evolution of  
526 OH Reactivity in NO-Free Volatile Organic Compound Photooxidation Investigated by the  
527 Fully Explicit GECKO-A Model. *Atmos. Chem. Phys.* **2021**, *21* (19), 14649–14669.
- 528 (39) Peng, Z.; Jimenez, J. L. KinSim: A Research-Grade, User-Friendly, Visual Kinetics  
529 Simulator for Chemical-Kinetics and Environmental-Chemistry Teaching. *J. Chem. Educ.*



- 530           **2019**, *96* (4), 806–811.
- 531 (40)   Downloadable *KinSim cases and mechanisms*. Google Docs.
- 532           [https://docs.google.com/document/d/10OuUMtMGJsh90cQ3p4Y\\_oiKQdPRHYQnxKQr2\\_l6](https://docs.google.com/document/d/10OuUMtMGJsh90cQ3p4Y_oiKQdPRHYQnxKQr2_l62Kx0)
- 533           2Kx0 (accessed 2022-07-31).
- 534 (41)   McDonald, B. C.; de Gouw, J. A.; Gilman, J. B.; Jathar, S. H.; Akherati, A.; Cappa, C. D.;
- 535           Jimenez, J. L.; Lee-Taylor, J.; Hayes, P. L.; McKeen, S. A.; Cui, Y. Y.; Kim, S.-W.;
- 536           Gentner, D. R.; Isaacman-VanWertz, G.; Goldstein, A. H.; Harley, R. A.; Frost, G. J.;
- 537           Roberts, J. M.; Ryerson, T. B.; Trainer, M. Volatile Chemical Products Emerging as Largest
- 538           Petrochemical Source of Urban Organic Emissions. *Science* **2018**, *359* (6377), 760–764.
- 539 (42)   Upper room germicidal ultraviolet fixtures. AeroMed Technologies.
- 540           <https://aeromed.com/product/upper-room-guv-fixtures/> (accessed 2022-02-21).
- 541 (43)   Xu, P.; Kujundzic, E.; Peccia, J.; Schafer, M. P.; Moss, G.; Hernandez, M.; Miller, S. L.
- 542           Impact of Environmental Factors on Efficacy of Upper-Room Air Ultraviolet Germicidal
- 543           Irradiation for Inactivating Airborne Mycobacteria. *Environ. Sci. Technol.* **2005**, *39* (24),
- 544           9656–9664.
- 545 (44)   Xu, P.; Peccia, J.; Fabian, P.; Martyny, J. W.; Fennelly, K. P.; Hernandez, M.; Miller, S.
- 546           L. Efficacy of Ultraviolet Germicidal Irradiation of Upper-Room Air in Inactivating Airborne
- 547           Bacterial Spores and Mycobacteria in Full-Scale Studies. *Atmos. Environ.* **2003**, *37* (3),
- 548           405–419.
- 549 (45)   Nicas, M.; Miller, S. L. A Multi-Zone Model Evaluation of the Efficacy of Upper-Room Air
- 550           Ultraviolet Germicidal Irradiation. *Appl. Occup. Environ. Hyg.* **1999**, *14* (5), 317–328.
- 551 (46)   Lakey, P. S. J.; Won, Y.; Shaw, D.; Østerstrøm, F. F.; Mattila, J.; Reidy, E.; Bottorff, B.;
- 552           Rosales, C.; Wang, C.; Ampollini, L.; Zhou, S.; Novoselac, A.; Kahan, T. F.; DeCarlo, P. F.;
- 553           Abbatt, J. P. D.; Stevens, P. S.; Farmer, D. K.; Carslaw, N.; Rim, D.; Shiraiwa, M. Spatial
- 554           and Temporal Scales of Variability for Indoor Air Constituents. *Communications Chemistry*
- 555           **2021**, *4* (1), 110.
- 556 (47)   Daisey, J. M.; Angell, W. J.; Apte, M. G. Indoor Air Quality, Ventilation and Health
- 557           Symptoms in Schools: An Analysis of Existing Information. *Indoor Air* **2003**, *13* (1), 53–64.
- 558 (48)   Lee, K.; Vallarino, J.; Dumyahn, T.; Ozkaynak, H.; Spengler, J. D. Ozone Decay Rates in
- 559           Residences. *J. Air Waste Manage. Assoc.* **1999**, *49* (10), 1238–1244.
- 560 (49)   Buonanno, G.; Morawska, L.; Stabile, L. Quantitative Assessment of the Risk of Airborne
- 561           Transmission of SARS-CoV-2 Infection: Prospective and Retrospective Applications.
- 562           *Environ. Int.* **2020**, *145*, 106112.
- 563 (50)   Riley, E. C.; Murphy, G.; Riley, R. L. Airborne Spread of Measles in a Suburban
- 564           Elementary School. *Am. J. Epidemiol.* **1978**, *107* (5), 421–432.
- 565 (51)   EPA. Chapter 6—Inhalation Rates. In *Exposure Factors Handbook*; U.S. Environmental
- 566           Protection Agency, 2011.
- 567 (52)   Peng, Z.; Jimenez, J. L. Exhaled CO<sub>2</sub> as a COVID-19 Infection Risk Proxy for Different
- 568           Indoor Environments and Activities. *Environmental Science & Technology Letters* **2021**, *8*
- 569           (5), 392–397.
- 570 (53)   Ren, X.; Olson, J. R.; Crawford, J. H.; Brune, W. H.; Mao, J.; Long, R. B.; Chen, Z.;
- 571           Chen, G.; Avery, M. A.; Sachse, G. W.; Barrick, J. D.; Diskin, G. S.; Huey, L. G.; Fried, A.;
- 572           Cohen, R. C.; Heikes, B.; Wennberg, P. O.; Singh, H. B.; Blake, D. R.; Shetter, R. E.
- 573           HO<sub>x</sub>chemistry during INTEX-A 2004: Observation, Model Calculation, and Comparison with
- 574           Previous Studies. *J. Geophys. Res.* **2008**, *113* (D5). <https://doi.org/10.1029/2007jd009166>.
- 575 (54)   Peng, Z.; Lee-Taylor, J.; Orlando, J. J.; Tyndall, G. S.; Jimenez, J. L. Organic Peroxy
- 576           Radical Chemistry in Oxidation Flow Reactors and Environmental Chambers and Their
- 577           Atmospheric Relevance. *Atmos. Chem. Phys.* **2019**, *19* (2), 813–834.
- 578 (55)   Pagonis, D.; Algrim, L. B.; Price, D. J.; Day, D. A.; Handschy, A. V.; Stark, H.; Miller, S.
- 579           L.; de Gouw, J. A.; Jimenez, J. L.; Ziemann, P. J. Autoxidation of Limonene Emitted in a
- 580           University Art Museum. *Environ. Sci. Technol. Lett.* **2019**, *6* (9), 520–524.

- 581 (56) Shrivastava, M.; Cappa, C. D.; Fan, J.; Goldstein, A. H.; Guenther, A. B.; Jimenez, J. L.;  
582 Kuang, C.; Laskin, A.; Martin, S. T.; Ng, N. L.; Petaja, T.; Pierce, J. R.; Rasch, P. J.; Roldin,  
583 P.; Seinfeld, J. H.; Shilling, J.; Smith, J. N.; Thornton, J. A.; Volkamer, R.; Wang, J.;  
584 Worsnop, D. R.; Zaveri, R. A.; Zelenyuk, A.; Zhang, Q. Recent Advances in Understanding  
585 Secondary Organic Aerosol: Implications for Global Climate Forcing. *Rev. Geophys.* **2017**,  
586 *55* (2), 509–559.
- 587 (57) Hhs, U. S. Agency for Toxic Substances and Disease Registry Minimal Risk Levels  
588 [WWW Document]. URL <https://www.atsdr.cdc.gov/about/index.html> (accessed 12. 18.  
589 18) **2018**.
- 590 (58) Whalen, J. J. *Environmental Control for Tuberculosis; Basic Upper-Room Ultraviolet*  
591 *Germicidal Irradiation Guidelines for Healthcare Settings Guide*; (NIOSH) 2009-105; 2009.
- 592 (59) Riley, R. L.; Permutt, S. Room Air Disinfection by Ultraviolet Irradiation of Upper Air. Air  
593 Mixing and Germicidal Effectiveness. *Arch. Environ. Health* **1971**, *22* (2), 208–219.
- 594 (60) Morawska, L.; Tang, J. W.; Bahnfleth, W.; Bluysen, P. M.; Boerstra, A.; Buonanno, G.;  
595 Cao, J.; Dancer, S.; Floto, A.; Franchimon, F.; Haworth, C.; Hogeling, J.; Isaxon, C.;  
596 Jimenez, J. L.; Kurnitski, J.; Li, Y.; Loomans, M.; Marks, G.; Marr, L. C.; Mazzeo, L.;  
597 Melikov, A. K.; Miller, S.; Milton, D. K.; Nazaroff, W.; Nielsen, P. V.; Noakes, C.; Peccia, J.;  
598 Querol, X.; Sekhar, C.; Seppänen, O.; Tanabe, S.-I.; Tellier, R.; Tham, K. W.; Wargocki, P.;  
599 Wierzbicka, A.; Yao, M. How Can Airborne Transmission of COVID-19 Indoors Be  
600 Minimised? *Environ. Int.* **2020**, *142*, 105832.
- 601 (61) Lee, P.; Davidson, J. Evaluation of Activated Carbon Filters for Removal of Ozone at the  
602 PPB Level. *Am. Ind. Hyg. Assoc. J.* **1999**, *60* (5), 589–600.
- 603 (62) Mochida, I.; Korai, Y.; Shirahama, M.; Kawano, S.; Hada, T.; Seo, Y.; Yoshikawa, M.;  
604 Yasutake, A. Removal of SO<sub>x</sub> and NO<sub>x</sub> over Activated Carbon Fibers. *Carbon N. Y.* **2000**,  
605 *38* (2), 227–239.

606
